# Supplementary material for: Remote sensing and bioacoustics reveal avian niche partitioning and habitat filtering
Source: Research Square preprint supplement (doi:10.21203/rs.3.rs-7761343/v1), 2025-10-08
Supplement: Supplementary file 1 [file 73419b8f1986d9bf8eb6310e.xlsx]

## Sheet: Biocube_variables
Variable Name	File Name	Last modified	Category	Description	Source	DOI	Dataset	Used in PCA	Notes
bio01	CA_Climate_CHELSA_bio01_v2.tif	2023-09-15	Climate	Mean annual air temperature	Karger et al. 2017	https://doi.org/10.1038/sdata.2017.122	https://doi.org/10.5061/dryad.kd1d4	NO	> 95% correlation with DTM
bio02	CA_Climate_CHELSA_bio02_v2.tif	2023-09-15	Climate	Mean diurnal air temperature range	Karger et al. 2017	https://doi.org/10.1038/sdata.2017.122	https://doi.org/10.5061/dryad.kd1d4	yes	NA
bio03	CA_Climate_CHELSA_bio03_v2.tif	2023-09-15	Climate	Isothermality	Karger et al. 2017	https://doi.org/10.1038/sdata.2017.122	https://doi.org/10.5061/dryad.kd1d4	yes	NA
bio04	CA_Climate_CHELSA_bio04_v2.tif	2023-09-15	Climate	Temperature seasonality	Karger et al. 2017	https://doi.org/10.1038/sdata.2017.122	https://doi.org/10.5061/dryad.kd1d4	yes	NA
bio05	CA_Climate_CHELSA_bio05_v2.tif	2023-09-15	Climate	Mean daily maximum air temperature of the warmest month	Karger et al. 2017	https://doi.org/10.1038/sdata.2017.122	https://doi.org/10.5061/dryad.kd1d4	NO	> 95% correlation with DTM
bio06	CA_Climate_CHELSA_bio06_v2.tif	2023-09-15	Climate	Mean daily minimum air temperature of the coldest month	Karger et al. 2017	https://doi.org/10.1038/sdata.2017.122	https://doi.org/10.5061/dryad.kd1d4	NO	> 95% correlation with DTM
bio07	CA_Climate_CHELSA_bio07_v2.tif	2023-09-15	Climate	Annual range of air temperature	Karger et al. 2017	https://doi.org/10.1038/sdata.2017.122	https://doi.org/10.5061/dryad.kd1d4	yes	NA
bio08	CA_Climate_CHELSA_bio08_v2.tif	2023-09-15	Climate	Mean daily mean air temperatures of the wettest quarter	Karger et al. 2017	https://doi.org/10.1038/sdata.2017.122	https://doi.org/10.5061/dryad.kd1d4	NO	> 95% correlation with DTM
bio09	CA_Climate_CHELSA_bio09_v2.tif	2023-09-15	Climate	Mean Temperature of Driest Quarter [°C*10]	Karger et al. 2017	https://doi.org/10.1038/sdata.2017.122	https://doi.org/10.5061/dryad.kd1d4	NO	> 95% correlation with bio10
bio10	CA_Climate_CHELSA_bio10_v2.tif	2023-09-15	Climate	Mean daily mean air temperatures of the warmest quarter	Karger et al. 2017	https://doi.org/10.1038/sdata.2017.122	https://doi.org/10.5061/dryad.kd1d4	NO	> 95% correlation with DTM
bio11	CA_Climate_CHELSA_bio11_v2.tif	2023-09-15	Climate	Mean Temperature of Coldest Quarter [°C*10]	Karger et al. 2017	https://doi.org/10.1038/sdata.2017.122	https://doi.org/10.5061/dryad.kd1d4	NO	> 95% correlation with bio08
bio12	CA_Climate_CHELSA_bio12_v2.tif	2023-09-15	Climate	Annual precipitation amount	Karger et al. 2017	https://doi.org/10.1038/sdata.2017.122	https://doi.org/10.5061/dryad.kd1d4	yes	NA
bio13	CA_Climate_CHELSA_bio13_v2.tif	2023-09-15	Climate	Precipitation amount of the wettest month	Karger et al. 2017	https://doi.org/10.1038/sdata.2017.122	https://doi.org/10.5061/dryad.kd1d4	yes	NA
bio14	CA_Climate_CHELSA_bio14_v2.tif	2023-09-15	Climate	Precipitation amount of the driest month	Karger et al. 2017	https://doi.org/10.1038/sdata.2017.122	https://doi.org/10.5061/dryad.kd1d4	yes	NA
bio15	CA_Climate_CHELSA_bio15_v2.tif	2023-09-15	Climate	Precipitation seasonality	Karger et al. 2017	https://doi.org/10.1038/sdata.2017.122	https://doi.org/10.5061/dryad.kd1d4	yes	NA
bio16	CA_Climate_CHELSA_bio16_v2.tif	2023-09-15	Climate	Precipitation of Wettest Quarter [mm/quarter]	Karger et al. 2017	https://doi.org/10.1038/sdata.2017.122	https://doi.org/10.5061/dryad.kd1d4	NO	> 95% correlation with bio19
bio17	CA_Climate_CHELSA_bio17_v2.tif	2023-09-15	Climate	Mean monthly precipitation amount of the driest quarter	Karger et al. 2017	https://doi.org/10.1038/sdata.2017.122	https://doi.org/10.5061/dryad.kd1d4	yes	NA
bio18	CA_Climate_CHELSA_bio18_v2.tif	2023-09-15	Climate	Mean monthly precipitation amount of the warmest quarter	Karger et al. 2017	https://doi.org/10.1038/sdata.2017.122	https://doi.org/10.5061/dryad.kd1d4	yes	NA
bio19	CA_Climate_CHELSA_bio19_v2.tif	2023-09-15	Climate	Mean monthly precipitation amount of the coldest quarter	Karger et al. 2017	https://doi.org/10.1038/sdata.2017.122	https://doi.org/10.5061/dryad.kd1d4	NO	> 95% correlation with bio12
fcf	CA_Climate_CHELSA_fcf_v2.tif	2023-09-15	Climate	Frost change frequency	Karger et al. 2017	https://doi.org/10.1038/sdata.2017.122	https://doi.org/10.5061/dryad.kd1d4	yes	NA
gdd0	CA_Climate_CHELSA_gdd0_v2.tif	2023-09-15	Climate	Growing degree days heat sum above 0˚C	Karger et al. 2017	https://doi.org/10.1038/sdata.2017.122	https://doi.org/10.5061/dryad.kd1d4	NO	> 95% correlation with DTM
gdd10	CA_Climate_CHELSA_gdd10_v2.tif	2023-09-15	Climate	Growing degree days heat sum above 10˚C	Karger et al. 2017	https://doi.org/10.1038/sdata.2017.122	https://doi.org/10.5061/dryad.kd1d4	NO	> 95% correlation with DTM
gdd5	CA_Climate_CHELSA_gdd5_v2.tif	2023-09-15	Climate	Growing degree days heat sum above 5˚C	Karger et al. 2017	https://doi.org/10.1038/sdata.2017.122	https://doi.org/10.5061/dryad.kd1d4	NO	> 95% correlation with ggd10
gsp	CA_Climate_CHELSA_gsp_v2.tif	2023-09-15	Climate	Accumulated precipitation amount on growing season days TREELIM	Karger et al. 2017	https://doi.org/10.1038/sdata.2017.122	https://doi.org/10.5061/dryad.kd1d4	yes	NA
gst	CA_Climate_CHELSA_gst_v2.tif	2023-09-15	Climate	Mean temperature of the growing season TREELIM	Karger et al. 2017	https://doi.org/10.1038/sdata.2017.122	https://doi.org/10.5061/dryad.kd1d4	yes	NA
ngd0	CA_Climate_CHELSA_ngd0_v2.tif	2023-09-15	Climate	Number of growing degree days at which tas >0˚C	Karger et al. 2017	https://doi.org/10.1038/sdata.2017.122	https://doi.org/10.5061/dryad.kd1d4	NO	> 95% correlation with swe
ngd10	CA_Climate_CHELSA_ngd10_v2.tif	2023-09-15	Climate	Number of growing degree days at which tas >10˚C	Karger et al. 2017	https://doi.org/10.1038/sdata.2017.122	https://doi.org/10.5061/dryad.kd1d4	NO	> 95% correlation with DTM
ngd5	CA_Climate_CHELSA_ngd5_v2.tif	2023-09-15	Climate	Number of growing degree days at which tas >5˚C	Karger et al. 2017	https://doi.org/10.1038/sdata.2017.122	https://doi.org/10.5061/dryad.kd1d4	NO	> 95% correlation with DTM
scd	CA_Climate_CHELSA_scd_v2.tif	2023-09-15	Climate	Snow cover days	Karger et al. 2017	https://doi.org/10.1038/sdata.2017.122	https://doi.org/10.5061/dryad.kd1d4	NO	> 95% correlation with swe
swe	CA_Climate_CHELSA_swe_v2.tif	2023-09-15	Climate	Snow water equivalent	Karger et al. 2017	https://doi.org/10.1038/sdata.2017.122	https://doi.org/10.5061/dryad.kd1d4	yes	NA
interStdcloud	CA_Climate_EarthEnv_interStd_v2.tif	2023-09-15	Climate	Inter-annual cloud cover variability	Wilson and Jetz 2016	https://doi.org/10.1371/journal.pbio.1002415	https://www.earthenv.org/cloud	yes	NA
intraStdcloud	CA_Climate_EarthEnv_intraStd_v2.tif	2023-09-15	Climate	Intra-annual cloud cover variability	Wilson and Jetz 2016	https://doi.org/10.1371/journal.pbio.1002415	https://www.earthenv.org/cloud	yes	NA
meanCloud	CA_Climate_EarthEnv_mean_v2.tif	2023-09-15	Climate	Mean annual cloud cover	Wilson and Jetz 2016	https://doi.org/10.1371/journal.pbio.1002415	https://www.earthenv.org/cloud	yes	NA
seasonality	CA_Climate_EarthEnv_seasonality_v2.tif	2023-09-15	Climate	Cloud cover seasonality	Wilson and Jetz 2016	https://doi.org/10.1371/journal.pbio.1002415	https://www.earthenv.org/cloud	yes	NA
spatialStd	CA_Climate_EarthEnv_spatialStd_v2.tif	2023-09-15	Climate	Cloud cover spatial variability	Wilson and Jetz 2016	https://doi.org/10.1371/journal.pbio.1002415	https://www.earthenv.org/cloud	yes	NA
annualPET	CA_Climate_ENVIREM_annualPET_v2.tif	2023-09-15	Climate	Annual potential evapotranspiration	Title and Bemmels 2018	https://doi.org/10.1111/ecog.02880	https://doi.org/10.7302/Z2BR8Q40	NO	> 95% correlation with DTM
aridityInd	CA_Climate_ENVIREM_aridityInd_v2.tif	2023-09-15	Climate	Aridity index; index of the degree of water deficit below water need	Title and Bemmels 2018	https://doi.org/10.1111/ecog.02880	https://doi.org/10.7302/Z2BR8Q40	yes	NA
climaticMoistInd	CA_Climate_ENVIREM_climaticMoistInd_v2.tif	2023-09-15	Climate	Climate moisture index; a metric of relative wetness and aridity	Title and Bemmels 2018	https://doi.org/10.1111/ecog.02880	https://doi.org/10.7302/Z2BR8Q40	yes	NA
continentality	CA_Climate_ENVIREM_continentality_v2.tif	2023-09-15	Climate	Continentality; average temperature of the warmest month - average temperature of the coldest month	Title and Bemmels 2018	https://doi.org/10.1111/ecog.02880	https://doi.org/10.7302/Z2BR8Q40	yes	NA
embergerQ	CA_Climate_ENVIREM_embergerQ_v2.tif	2023-09-15	Climate	Emberger's pluviothermic quotient; a metric to differentiate among Mediterranean type climates	Title and Bemmels 2018	https://doi.org/10.1111/ecog.02880	https://doi.org/10.7302/Z2BR8Q40	yes	NA
PETColdQuart	CA_Climate_ENVIREM_PETColdQuart_v2.tif	2023-09-15	Climate	Mean monthly potenatial evapotranspiration of the coldest quarter	Title and Bemmels 2018	https://doi.org/10.1111/ecog.02880	https://doi.org/10.7302/Z2BR8Q40	yes	NA
PETDryQuart	CA_Climate_ENVIREM_PETDryQuart_v2.tif	2023-09-15	Climate	Mean monthly potenatial evapotranspiration of the driest quarter	Title and Bemmels 2018	https://doi.org/10.1111/ecog.02880	https://doi.org/10.7302/Z2BR8Q40	NO	> 95% correlation with DTM
PETseas	CA_Climate_ENVIREM_PETseas_v2.tif	2023-09-15	Climate	Monthly variability in potential evapotranspiration	Title and Bemmels 2018	https://doi.org/10.1111/ecog.02880	https://doi.org/10.7302/Z2BR8Q40	NO	> 95% correlation with DTM
PETWarmQuart	CA_Climate_ENVIREM_PETWarmQuart_v2.tif	2023-09-15	Climate	Mean monthly potenatial evapotranspiration of the warmest quarter	Title and Bemmels 2018	https://doi.org/10.1111/ecog.02880	https://doi.org/10.7302/Z2BR8Q40	NO	> 95% correlation with DTM
PETWetQuart	CA_Climate_ENVIREM_PETWetQuart_v2.tif	2023-09-15	Climate	Mean monthly potenatial evapotranspiration of the wettest quarter	Title and Bemmels 2018	https://doi.org/10.1111/ecog.02880	https://doi.org/10.7302/Z2BR8Q40	yes	NA
thermInd	CA_Climate_ENVIREM_thermInd_v2.tif	2023-09-15	Climate	Compensated thermicity index	Title and Bemmels 2018	https://doi.org/10.1111/ecog.02880	https://doi.org/10.7302/Z2BR8Q40	NO	> 95% correlation with DTM
WHI_pFWOS	CA_Climate_SILVISLab_WHI_pFWOS_v2.tif	2023-09-15	Climate	MODIS WInter Habitat Indices - percent frozen ground without snow	Gudex-Cross et al. 2021	https://doi.org/10.1016/j.rse.2021.112309	https://silvis.forest.wisc.edu/data/whis/	yes	NA
WHI_SCV	CA_Climate_SILVISLab_WHI_SCV_v2.tif	2023-09-15	Climate	MODIS WInter Habitat Indices - snow cover variability	Gudex-Cross et al. 2021	https://doi.org/10.1016/j.rse.2021.112309	https://silvis.forest.wisc.edu/data/whis/	yes	NA
WHI_SSL	CA_Climate_SILVISLab_WHI_SSL_v2.tif	2023-09-15	Climate	MODIS WInter Habitat Indices - snow season length	Gudex-Cross et al. 2021	https://doi.org/10.1016/j.rse.2021.112309	https://silvis.forest.wisc.edu/data/whis/	yes	NA
landcover_type	GAP_2011.tif	2024-08-26	Context	Land cover classification	USGS 2016	https://doi.org/10.5066/F7ZS2TM0	https://developers.google.com/earth-engine/datasets/catalog/USGS_GAP_CONUS_2011	NO	categorical variable. context only
PRI	CA_Anthropocene_Hoskins_et_al_LU2005_PRI.tif	2024-11-20	Disturbance	Primary vegetation percent cover	Hoskins et al. 2016	https://doi.org/10.1002/ece3.2104	https://doi.org/10.4225/08/56DCD9249B224	yes	NA
SEC	CA_Anthropocene_Hoskins_et_al_LU2005_SEC.tif	2024-11-20	Disturbance	Secondary vegetation percent cover	Hoskins et al. 2016	https://doi.org/10.1002/ece3.2104	https://doi.org/10.4225/08/56DCD9249B224	yes	NA
NTL_2020	CA_Anthropocene_Li_et_al_NTL_2020_.tif	2024-11-20	Disturbance	Night light 2020	Li et al. 2020	https://doi.org/10.1038/s41597-020-0510-y	https://doi.org/10.6084/m9.figshare.9828827.v2	yes	NA
conIntact	CA_Anthropocene_Mokany_et_al_conIntact.tif	2024-11-20	Disturbance	Contextual intactness	Mokany et al. 2020	https://doi.org/10.1073/pnas.1918373117	https://doi.org/10.25919/5e7854cfcb97e	yes	NA
NTL_Min	CA_Anthropocene_Mu_et_al_mNTL_Min.tif	2024-11-20	Disturbance	Minimum night light	Li et al. 2020	https://doi.org/10.1038/s41597-020-0510-y	https://doi.org/10.6084/m9.figshare.9828827.v2	yes	NA
GHM	CA_Anthropocene_NASA_SEDAC_nsGHM.tif	2024-11-20	Disturbance	Global human modification	Kennedy et al. 2019	https://doi.org/10.1111/gcb.14549	https://doi.org/10.1111/gcb.14549	yes	NA
bioIntact	CA_Anthropocene_Newbold_et_al_bioIntact.tif	2024-11-20	Disturbance	Biodiversity intactness	Newbold et al. 2016	https://doi.org/10.1126/science.aaf2201	https://doi.org/10.5519/0009936	yes	NA
exiSound	CA_Anthropocene_NPS_exiSound.tif	2024-11-20	Disturbance	Existing sound	Mennitt et al. 2014	https://www.researchgate.net/profile/Daniel-Mennitt/publication/258249644_Mapping_the_extent_of_noise_on_a_national_scale_using_geospatial_models/links/53e25c7c0cf2b9d0d82f0f9d/Mapping-the-extent-of-noise-on-a-national-scale-using-geospatial-models.pdf	https://irma.nps.gov/DataStore/Reference/Profile/2217356	yes	NA
impSound	CA_Anthropocene_NPS_impSound.tif	2024-11-20	Disturbance	Impacting sound	Mennitt et al. 2014	https://www.researchgate.net/profile/Daniel-Mennitt/publication/258249644_Mapping_the_extent_of_noise_on_a_national_scale_using_geospatial_models/links/53e25c7c0cf2b9d0d82f0f9d/Mapping-the-extent-of-noise-on-a-national-scale-using-geospatial-models.pdf	https://irma.nps.gov/DataStore/Reference/Profile/2217356	yes	NA
GHM_ag	CA_Anthropocene_Theobald_et_al_tGHM_ag.tif	2024-11-20	Disturbance	Agriculture percent cover	Theobald et al. 2020	https://doi.org/10.5194/essd-12-1953-2020	https://doi.org/10.5281/zenodo.3963013	yes	NA
GHM_bu	CA_Anthropocene_Theobald_et_al_tGHM_bu.tif	2024-11-20	Disturbance	Built-up percent cover	Theobald et al. 2020	https://doi.org/10.5194/essd-12-1953-2020	https://doi.org/10.5281/zenodo.3963013	yes	NA
GHM_en	CA_Anthropocene_Theobald_et_al_tGHM_en.tif	2024-11-20	Disturbance	Energy production percent cover	Theobald et al. 2020	https://doi.org/10.5194/essd-12-1953-2020	https://doi.org/10.5281/zenodo.3963013	yes	NA
GHM_in	CA_Anthropocene_Theobald_et_al_tGHM_in.tif	2024-11-20	Disturbance	human intrusions	Theobald et al. 2020	https://doi.org/10.5194/essd-12-1953-2020	https://doi.org/10.5281/zenodo.3963013	yes	NA
GHM_tr	CA_Anthropocene_Theobald_et_al_tGHM_tr.tif	2024-11-20	Disturbance	transportation percent cover	Theobald et al. 2020	https://doi.org/10.5194/essd-12-1953-2020	https://doi.org/10.5281/zenodo.3963013	yes	NA
A2C	CA_Anthropocene_Weiss_et_al_A2C.tif	2024-11-20	Disturbance	Access to cities	Weiss et al. 2018	https://doi.org/10.1038/nature25181	https://doi.org/10.1038/nature25181	yes	NA
burn_year	California_Fire_Perimeters_2024.zip	2024-09-04	Disturbance	year of the most recent fire	Wallin 2024	https://calfire-forestry.maps.arcgis.com/home/item.html?id=c3c10388e3b24cec8a954ba10458039d	https://services1.arcgis.com/jUJYIo9tSA7EHvfZ/arcgis/rest/services/California_Historic_Fire_Perimeters/FeatureServer/0	NO	data not available for all points. Used to exclude areas burned 2019-2023
ETv1_disALEXI	CA_Function_ECOSTRESS_ETv1_disALEXI.tif	2022-09-09	Function	Atmosphere-Land EXchange Inverse disaggregation - estimated evapotranspiration	Cawse-Nicholson et al. 2021	https://doi.org/10.1109/JSTARS.2021.3111867	https://cmr.earthdata.nasa.gov/search/concepts/C1534730413-LPDAAC_ECS.html	yes	NA
GEDI_AGB	CA_Function_GEDI_AGBv2.tif	2022-09-09	Function	Aboveground Biomass Density	Dubayah et al. 2022	https://doi.org/10.3334/ORNLDAAC/2056	https://daac.ornl.gov/cgi-bin/dsviewer.pl?ds_id=2056	yes	NA
GPP_annual	CA_Function_TROPOMI_GPP_annual.tif	2022-09-09	Function	gross primary production	Turner et al. 2021	https://doi.org/10.3334/ORNLDAAC/1875	https://daac.ornl.gov/cgi-bin/dsviewer.pl?ds_id=1875	yes	NA
CanopyHeight	Favrichon_Sierra_CanopyHeight_30m_20250508.tif	2025-05-08	Function	Canopy height RH98	Favichron et al. 2025	https://doi.org/10.3389/frsen.2024.1459524	https://developers.google.com/earth-engine/datasets/catalog/LARSE_GEDI_GEDI02_A_002_MONTHLY#bands	yes	NA
MidCanopyHeight	Favrichon_Sierra_RH50_30m_20250508.tif	2025-05-08	Function	Mid canopy height RH50	Favichron et al. 2025	https://doi.org/10.3389/frsen.2024.1459524	https://developers.google.com/earth-engine/datasets/catalog/LARSE_GEDI_GEDI02_A_002_MONTHLY#bands	yes	NA
Biomass	GEDI_Cali_Biomass_1km_20250429.tif	2025-04-29	Function	Biomass	Dubayah et al. 2022	https://daac.ornl.gov/cgi-bin/dsviewer.pl?ds_id=2017	https://doi.org/10.3334/ORNLDAAC/2299	yes	NA
StructRich	GEDI_Cali_StructuralRichness_1km_20240120.tif	2025-04-29	Function	Structural richness	Dubayah et al. 2022	https://daac.ornl.gov/cgi-bin/dsviewer.pl?ds_id=2017	https://doi.org/10.3334/ORNLDAAC/2299	yes	NA
DHI_FPAR8	CA_Phenology_SILVISLab_DHI_FPAR8_v2.tif	2024-11-20	Phenology	Cumulative fraction absorbed photosynthetically active radiation	Hobi et al. 2017	https://doi.org/10.1016/j.rse.2017.04.018	https://silvis.forest.wisc.edu/data/dhis/	yes	NA
DHI_GPP	CA_Phenology_SILVISLab_DHI_GPP_v2.tif	2024-11-20	Phenology	Cumulative gross primary productivity	Hobi et al. 2017	https://doi.org/10.1016/j.rse.2017.04.018	https://silvis.forest.wisc.edu/data/dhis/	yes	NA
DHI_LAI8	CA_Phenology_SILVISLab_DHI_LAI8_v2.tif	2024-11-20	Phenology	Cumulative leaf area index	Hobi et al. 2017	https://doi.org/10.1016/j.rse.2017.04.018	https://silvis.forest.wisc.edu/data/dhis/	yes	NA
DHI_NDVI	CA_Phenology_SILVISLab_DHI_NDVI_v2.tif	2024-11-20	Phenology	Cumulative normalized difference vegetative index	Hobi et al. 2017	https://doi.org/10.1016/j.rse.2017.04.018	https://silvis.forest.wisc.edu/data/dhis/	yes	NA
AMP	CA_Phenology_USGS_AMP_v2.tif	2023-09-16	Phenology	Amplitude; maximum increase in canopy photosynthetic activity above the baseline	USGS EROS 2018	https://doi.org/10.5066/F7MW2FBS	https://doi.org/10.5066/F7PC30G1	yes	NA
DUR	CA_Phenology_USGS_DUR_v2.tif	2023-09-16	Phenology	Duration of the growing season	USGS EROS 2018	https://doi.org/10.5066/F7MW2FBS	https://doi.org/10.5066/F7PC30G1	yes	NA
EOST	CA_Phenology_USGS_EOST_v2.tif	2023-09-16	Phenology	End of season time	USGS EROS 2018	https://doi.org/10.5066/F7MW2FBS	https://doi.org/10.5066/F7PC30G1	yes	NA
MAXN	CA_Phenology_USGS_MAXN_v2.tif	2023-09-16	Phenology	Maximum level of photosynthetic activity in the canopy	USGS EROS 2018	https://doi.org/10.5066/F7MW2FBS	https://doi.org/10.5066/F7PC30G1	yes	NA
MAXT	CA_Phenology_USGS_MAXT_v2.tif	2023-09-16	Phenology	Time of maximum photosynthesis in the canopy	USGS EROS 2018	https://doi.org/10.5066/F7MW2FBS	https://doi.org/10.5066/F7PC30G1	yes	NA
SOST	CA_Phenology_USGS_SOST_v2.tif	2023-09-16	Phenology	Start of season time	USGS EROS 2018	https://doi.org/10.5066/F7MW2FBS	https://doi.org/10.5066/F7PC30G1	yes	NA
Calcium	20180621_Calcium_30m_polished	2024-11-19	Physiology	Calcium	Zheng et al. 2025	https://doi.org/10.3334/ORNLDAAC/2403	https://doi.org/10.3334/ORNLDAAC/2403	yes	NA
Cellulose	20180621_Cellulose_30m_polished	2024-11-19	Physiology	Cellulose	Zheng et al. 2025	https://doi.org/10.3334/ORNLDAAC/2403	https://doi.org/10.3334/ORNLDAAC/2403	yes	NA
Chlorophylls	20180621_Chlorophylls_30m_polished	2024-11-19	Physiology	Chlorophylls	Zheng et al. 2025	https://doi.org/10.3334/ORNLDAAC/2403	https://doi.org/10.3334/ORNLDAAC/2403	yes	NA
Fiber	20180621_Fiber_30m_polished	2024-11-19	Physiology	Fiber	Zheng et al. 2025	https://doi.org/10.3334/ORNLDAAC/2403	https://doi.org/10.3334/ORNLDAAC/2403	yes	NA
Lignin	20180621_Lignin_30m_polished	2024-11-19	Physiology	Lignin	Zheng et al. 2025	https://doi.org/10.3334/ORNLDAAC/2403	https://doi.org/10.3334/ORNLDAAC/2403	yes	NA
LMA	20180621_LMA_30m_polished	2024-11-19	Physiology	LMA	Zheng et al. 2025	https://doi.org/10.3334/ORNLDAAC/2403	https://doi.org/10.3334/ORNLDAAC/2403	yes	NA
Nitrogen	20180621_Nitrogen_30m_polished	2024-11-19	Physiology	Nitrogen	Zheng et al. 2025	https://doi.org/10.3334/ORNLDAAC/2403	https://doi.org/10.3334/ORNLDAAC/2403	yes	NA
NSC	20180621_NSC_30m_polished	2024-11-19	Physiology	NSC	Zheng et al. 2025	https://doi.org/10.3334/ORNLDAAC/2403	https://doi.org/10.3334/ORNLDAAC/2403	yes	NA
Phenolics	20180621_Phenolics_30m_polished	2024-11-19	Physiology	Phenolics	Zheng et al. 2025	https://doi.org/10.3334/ORNLDAAC/2403	https://doi.org/10.3334/ORNLDAAC/2403	yes	NA
Phosphorus	20180621_Phosphorus_30m_polished	2024-11-19	Physiology	Phosphorus	Zheng et al. 2025	https://doi.org/10.3334/ORNLDAAC/2403	https://doi.org/10.3334/ORNLDAAC/2403	yes	NA
Potassium	20180621_Potassium_30m_polished	2024-11-19	Physiology	Potassium	Zheng et al. 2025	https://doi.org/10.3334/ORNLDAAC/2403	https://doi.org/10.3334/ORNLDAAC/2403	yes	NA
Starch	20180621_Starch_30m_polished	2024-11-19	Physiology	Starch	Zheng et al. 2025	https://doi.org/10.3334/ORNLDAAC/2403	https://doi.org/10.3334/ORNLDAAC/2403	NO	> 95% correlation with LMA
Sugar	20180621_Sugar_30m_polished	2024-11-19	Physiology	Sugar	Zheng et al. 2025	https://doi.org/10.3334/ORNLDAAC/2403	https://doi.org/10.3334/ORNLDAAC/2403	yes	NA
Sulfur	20180621_Sulfur_30m_polished	2024-11-19	Physiology	Sulfur	Zheng et al. 2025	https://doi.org/10.3334/ORNLDAAC/2403	https://doi.org/10.3334/ORNLDAAC/2403	yes	NA
bdod_0_200	CA_Soil_SoilGrids_bdod_0_200.tif	2023-05-09	Terrain	bulk density at 0-200 cm depth	Batjes et al. 2020	https://doi.org/10.5194/essd-12-299-2020	https://soilgrids.org/	yes	NA
cec_0_200	CA_Soil_SoilGrids_cec_0_200.tif	2022-03-29	Terrain	cation exchange capacity at 0-200 cm depth	Batjes et al. 2020	https://doi.org/10.5194/essd-12-299-2020	https://soilgrids.org/	yes	NA
cfvo_0_200	CA_Soil_SoilGrids_cfvo_0_200.tif	2022-03-29	Terrain	Volumetric proportion of coarse fragments at 0-200 cm depth	Batjes et al. 2020	https://doi.org/10.5194/essd-12-299-2020	https://soilgrids.org/	yes	NA
clay_0_200	CA_Soil_SoilGrids_clay_0_200.tif	2023-05-09	Terrain	Clay content at 0-200 cm depth	Batjes et al. 2020	https://doi.org/10.5194/essd-12-299-2020	https://soilgrids.org/	yes	NA
nitrogen_0_200	CA_Soil_SoilGrids_nitrogen_0_200.tif	2023-05-09	Terrain	Nitrogen at 0-200 cm depth	Batjes et al. 2020	https://doi.org/10.5194/essd-12-299-2020	https://soilgrids.org/	yes	NA
ocd_0_200	CA_Soil_SoilGrids_ocd_0_200.tif	2022-03-29	Terrain	Organic carbon density at 0-200 cm depth	Batjes et al. 2020	https://doi.org/10.5194/essd-12-299-2020	https://soilgrids.org/	yes	NA
phh2o_0_200	CA_Soil_SoilGrids_phh2o_0_200.tif	2022-03-29	Terrain	pH water at 0-200 cm depth	Batjes et al. 2020	https://doi.org/10.5194/essd-12-299-2020	https://soilgrids.org/	yes	NA
sand_0_200	CA_Soil_SoilGrids_sand_0_200.tif	2023-05-09	Terrain	Sand at 0-200 cm depth	Batjes et al. 2020	https://doi.org/10.5194/essd-12-299-2020	https://soilgrids.org/	yes	NA
silt_0_200	CA_Soil_SoilGrids_silt_0_200.tif	2022-03-29	Terrain	Silt at 0-200 cm depth	Batjes et al. 2020	https://doi.org/10.5194/essd-12-299-2020	https://soilgrids.org/	yes	NA
ASP_N	CA_Topography_EarthEnv_ASP_N_v2.tif	2023-09-15	Terrain	Aspect northness	Amatulli et al. 2018	https://doi.org/10.1038/sdata.2018.40	https://www.earthenv.org/topography	yes	NA
DTM_std	CA_Topography_EarthEnv_DTM_std_v2.tif	2023-09-15	Terrain	Elevation standard deviation	Amatulli et al. 2018	https://doi.org/10.1038/sdata.2018.40	https://www.earthenv.org/topography	yes	NA
DTM	CA_Topography_EarthEnv_DTM_v2.tif	2023-09-15	Terrain	Elevation	Amatulli et al. 2018	https://doi.org/10.1038/sdata.2018.40	https://www.earthenv.org/topography	yes	NA
Slope_std	CA_Topography_EarthEnv_Slope_std_v2.tif	2023-09-15	Terrain	Slope standard deviation	Amatulli et al. 2018	https://doi.org/10.1038/sdata.2018.40	https://www.earthenv.org/topography	yes	NA
Slope	CA_Topography_EarthEnv_Slope_v2.tif	2023-09-15	Terrain	Slope	Amatulli et al. 2018	https://doi.org/10.1038/sdata.2018.40	https://www.earthenv.org/topography	yes	NA
TRI	CA_Topography_EarthEnv_TRI_v2.tif	2023-09-15	Terrain	Terrain Ruggedness Index	Amatulli et al. 2018	https://doi.org/10.1038/sdata.2018.40	https://www.earthenv.org/topography	NO	> 95% correlation with slope

## Sheet: Definitions
Variable Name	Name of this variable in predictive models
Category	Type of variable: anthropocene, climate, phenology, soil, topography
Description	Description fo what this variable measures
Source	First author and year of publication from the article where this data was first published
DOI	DOI of the research article where this data was first published
Dataset	link to access this dataset
